# Supplementary material
Source: PubMed Central journal article supplement (PMC4807502)
Supplement: IAI.01296-15_zii999091638so1.pdf [file IAI.01296-15_zii999091638so1.pdf]

# Supplementary Material

**The *fruRBA* operon is necessary for Group A Streptococcal growth in fructose and for resistance to neutrophil killing during growth in whole human blood**

Kayla M. Valdes<sup>1Ψ</sup>, Ganesh S. Sundar<sup>1Ψ</sup>, Luis A. Vega<sup>1</sup>, Ashton T. Belew<sup>1,3</sup>, Emrul Islam<sup>1</sup>, Rachel Binet<sup>2</sup>, Najib M. El-Sayed<sup>1,3</sup>, Yoann Le Breton<sup>1\*</sup>, and Kevin S. McIver<sup>1\*</sup>

<sup>1</sup>Department of Cell Biology & Molecular Genetics and Maryland Pathogen Research Institute, University of Maryland, College Park, MD 20742

<sup>2</sup>Center for Food Safety and Applied Nutrition, U.S. Food and Drug Administration, College Park, MD 20740

<sup>3</sup>Center for Bioinformatics and Computational Biology, University of Maryland, College Park, MD 20742

\*Corresponding Authors:

Email: [lebreton@umd.edu](mailto:lebreton@umd.edu) and [kmeiver@umd.edu](mailto:kmeiver@umd.edu)

Table S1: Genes in 5448 differentially expressed in CDM-glucose compared to CDM-fructose

| <b>Spy #</b>   | <b>Annotation</b>                                    | <b>Gene Name</b> | <b>Log<sub>2</sub> FC</b> |
|----------------|------------------------------------------------------|------------------|---------------------------|
| M5005_Spy_0039 | alcohol dehydrogenase/acetaldehyde dehydrogenase     | <i>adh.2</i>     | -2.10                     |
| M5005_Spy_0086 | comG operon protein 1                                | <i>comYA</i>     | -0.99                     |
| M5005_Spy_0089 | comG operon protein 4                                |                  | 1.72                      |
| M5005_Spy_0120 | acetate CoA-transferase alpha subunit                | <i>atoD.2</i>    | 1.76                      |
| M5005_Spy_0123 | translation initiation inhibitor                     |                  | -1.82                     |
| M5005_Spy_0124 | serine catabolism regulator                          | <i>sloR</i>      | -2.32                     |
| M5005_Spy_0125 | hypothetical protein                                 |                  | -1.09                     |
| M5005_Spy_0126 | V-type sodium ATP synthase subunit I                 | <i>ntpI</i>      | -2.01                     |
| M5005_Spy_0127 | V-type sodium ATP synthase subunit K                 | <i>ntpK</i>      | -1.97                     |
| M5005_Spy_0128 | V-type sodium ATP synthase subunit E                 | <i>ntpE</i>      | -2.22                     |
| M5005_Spy_0129 | V-type ATP synthase subunit C                        | <i>ntpC</i>      | -1.79                     |
| M5005_Spy_0130 | V-type sodium ATP synthase subunit F                 | <i>ntpF</i>      | -1.22                     |
| M5005_Spy_0131 | V-type sodium ATP synthase subunit A                 | <i>ntpA</i>      | -1.24                     |
| M5005_Spy_0132 | V-type sodium ATP synthase subunit B                 | <i>ntpB</i>      | -0.96                     |
| M5005_Spy_0133 | V-type sodium ATP synthase subunit D                 | <i>ntpD</i>      | -1.21                     |
| M5005_Spy_0145 | hypothetical protein                                 |                  | -1.31                     |
| M5005_Spy_0150 | PTS system, 3-keto-L-gulonate specific IIA           | <i>ptxA</i>      | -0.99                     |
| M5005_Spy_0152 | L-xylulose 5-phosphate 3-epimerase                   |                  | 1.37                      |
| M5005_Spy_0154 | hypothetical protein                                 |                  | 1.57                      |
| M5005_Spy_0166 | transposase                                          |                  | -1.32                     |
| M5005_Spy_0167 | transposase                                          |                  | -1.15                     |
| M5005_Spy_0168 | transposase                                          |                  | -1.70                     |
| M5005_Spy_0170 | nicotinate-nucleotide pyrophosphorylase              | <i>nadC</i>      | -1.95                     |
| M5005_Spy_0184 | hypothetical cytosolic protein                       |                  | -1.28                     |
| M5005_Spy_0189 | hypothetical protein                                 |                  | -1.66                     |
| M5005_Spy_0256 | competence-specific sigma factor                     |                  | -1.68                     |
| M5005_Spy_0297 | transposase                                          |                  | -1.12                     |
| M5005_Spy_0395 | transposase                                          |                  | -1.39                     |
| M5005_Spy_0451 | transcriptional regulator                            |                  | -1.07                     |
| M5005_Spy_0460 | hypothetical protein                                 |                  | 1.13                      |
| M5005_Spy_0474 | transcription antiterminator, BglG family            | <i>licT</i>      | -1.36                     |
| M5005_Spy_0476 | 6-phospho-beta-glucosidase                           | <i>bglA</i>      | -1.22                     |
| M5005_Spy_0479 | hypothetical membrane spanning protein               |                  | -1.80                     |
| M5005_Spy_0518 | oligohyaluronate lyase                               |                  | 1.35                      |
| M5005_Spy_0521 | PTS system, N-acetylgalactosamine-specific IIB       | <i>agaV</i>      | -1.75                     |
| M5005_Spy_0616 | ferredoxin                                           |                  | -1.02                     |
| M5005_Spy_0650 | hypothetical protein                                 |                  | -1.95                     |
| M5005_Spy_0659 | 2-dehydropantoate 2-reductase                        | <i>apbA</i>      | -0.95                     |
| M5005_Spy_0660 | fructose repressor                                   | <i>fruR</i>      | -1.95                     |
| M5005_Spy_0661 | 1-phosphofructokinase                                | <i>fruB</i>      | -2.52                     |
| M5005_Spy_0662 | PTS system, Fructose-specific IIABC                  | <i>fruA</i>      | -3.33                     |
| M5005_Spy_0666 | hypothetical protein                                 |                  | -1.70                     |
| M5005_Spy_0667 | exotoxin type C precursor                            |                  | 2.07                      |
| M5005_Spy_0773 | hypothetical protein                                 |                  | 0.99                      |
| M5005_Spy_0798 | IFN-response binding factor 1                        |                  | -1.01                     |
| M5005_Spy_0800 | DNA-cytosine methyltransferase                       |                  | -1.38                     |
| M5005_Spy_0853 | short chain dehydrogenase                            |                  | -1.25                     |
| M5005_Spy_0912 | hypothetical protein                                 |                  | -1.41                     |
| M5005_Spy_0997 | phage protein                                        |                  | 1.20                      |
| M5005_Spy_0998 | phage protein                                        |                  | -1.40                     |
| M5005_Spy_0999 | phage protein                                        |                  | 1.92                      |
| M5005_Spy_1000 | phage protein                                        |                  | 2.52                      |
| M5005_Spy_1010 | phage protein                                        |                  | 1.56                      |
| M5005_Spy_1013 | antigen B                                            |                  | 2.32                      |
| M5005_Spy_1017 | phage protein                                        |                  | 2.65                      |
| M5005_Spy_1023 | terminase large subunit                              |                  | 1.52                      |
| M5005_Spy_1025 | phage encoded transcriptional regulator, ArpU family |                  | 0.96                      |

|                |                                                |               |       |
|----------------|------------------------------------------------|---------------|-------|
| M5005_Spy_1026 | phage protein                                  |               | 2.04  |
| M5005_Spy_1027 | phage protein                                  |               | 1.00  |
| M5005_Spy_1028 | phage protein                                  |               | 1.12  |
| M5005_Spy_1029 | phage protein                                  |               | 1.92  |
| M5005_Spy_1030 | phage protein                                  |               | 1.38  |
| M5005_Spy_1032 | phage protein                                  |               | 1.84  |
| M5005_Spy_1033 | phage protein                                  |               | 1.69  |
| M5005_Spy_1034 | phage protein                                  |               | 1.48  |
| M5005_Spy_1035 | phage protein                                  |               | 1.41  |
| M5005_Spy_1036 | phage single-strand DNA binding protein        | <i>ssb2</i>   | 1.48  |
| M5005_Spy_1037 | phage single-strand DNA binding protein        | <i>ssb1</i>   | 2.07  |
| M5005_Spy_1038 | phage protein                                  |               | 1.87  |
| M5005_Spy_1039 | phage protein                                  |               | 2.09  |
| M5005_Spy_1040 | phage protein                                  |               | 1.71  |
| M5005_Spy_1041 | phage protein                                  |               | 2.76  |
| M5005_Spy_1042 | phage replication protein                      |               | 2.03  |
| M5005_Spy_1043 | phage protein                                  |               | 1.88  |
| M5005_Spy_1045 | transcriptional regulator                      |               | 1.80  |
| M5005_Spy_1062 | maltodextrose utilization protein              | <i>malA</i>   | -1.12 |
| M5005_Spy_1063 | ABC Cyclomaltodextrin permease protein         | <i>malD</i>   | -1.17 |
| M5005_Spy_1078 | hypothetical protein                           |               | -1.53 |
| M5005_Spy_1081 | PTS system, Cellobiose-specific IIA component  |               | -0.98 |
| M5005_Spy_1089 | hypothetical protein                           |               | -1.19 |
| M5005_Spy_1090 | transposase                                    |               | -1.58 |
| M5005_Spy_1139 | glucosamine-6-phosphate isomerase              | <i>nagB</i>   | 0.98  |
| M5005_Spy_1172 | holin                                          |               | 0.99  |
| M5005_Spy_1173 | phage protein                                  |               | -1.33 |
| M5005_Spy_1174 | phage protein                                  |               | 2.37  |
| M5005_Spy_1175 | phage protein                                  |               | 1.47  |
| M5005_Spy_1176 | phage infection protein                        |               | 1.34  |
| M5005_Spy_1187 | phage structural protein                       |               | 1.05  |
| M5005_Spy_1190 | phage protein                                  |               | -1.19 |
| M5005_Spy_1200 | phage protein                                  |               | 1.14  |
| M5005_Spy_1201 | phage protein                                  |               | 1.94  |
| M5005_Spy_1203 | phage protein                                  |               | 2.16  |
| M5005_Spy_1204 | recT protein                                   |               | 1.59  |
| M5005_Spy_1205 | phage protein                                  |               | 1.75  |
| M5005_Spy_1206 | phage protein                                  |               | 1.91  |
| M5005_Spy_1208 | phage protein                                  |               | 2.23  |
| M5005_Spy_1209 | DNA replication protein                        |               | 1.82  |
| M5005_Spy_1210 | phage replication protein                      |               | 1.45  |
| M5005_Spy_1211 | phage protein                                  |               | 1.42  |
| M5005_Spy_1213 | phage protein                                  |               | 1.72  |
| M5005_Spy_1216 | phage protein                                  |               | 1.57  |
| M5005_Spy_1217 | phage antirepressor protein                    |               | 1.20  |
| M5005_Spy_1218 | phage protein                                  |               | 1.79  |
| M5005_Spy_1307 | hypothetical membrane spanning protein         |               | -1.02 |
| M5005_Spy_1308 | ABC unknown sugar-binding protein              |               | -1.16 |
| M5005_Spy_1309 | ABC unknown sugar permease protein             |               | -1.82 |
| M5005_Spy_1310 | ABC unknown sugar permease protein             |               | -1.40 |
| M5005_Spy_1388 | N-acetylglucosamine-6-phosphate deacetylase    | <i>nagA</i>   | 0.97  |
| M5005_Spy_1395 | tagatose-bisphosphate aldolase; SpeB regulator | <i>lacD.1</i> | -1.01 |
| M5005_Spy_1396 | tagatose-6-phosphate kinase                    | <i>lacC.1</i> | -1.35 |
| M5005_Spy_1397 | galactose-6-phosphate isomerase lacB subunit   | <i>lacB.1</i> | -1.54 |
| M5005_Spy_1400 | PTS system, Galactose-specific IIB component   |               | -1.45 |
| M5005_Spy_1401 | PTS system, Galactose-specific IIA component   |               | -1.14 |
| M5005_Spy_1414 | phage protein                                  |               | 1.42  |
| M5005_Spy_1416 | phage-associated cell wall hydrolase           |               | 1.90  |
| M5005_Spy_1417 | phage protein                                  |               | 1.44  |
| M5005_Spy_1418 | phage protein                                  |               | 2.34  |

|                |                                               |               |       |
|----------------|-----------------------------------------------|---------------|-------|
| M5005_Spy_1419 | phage protein                                 |               | 2.03  |
| M5005_Spy_1420 | phage protein                                 |               | 1.67  |
| M5005_Spy_1421 | phage infection protein                       |               | 1.81  |
| M5005_Spy_1422 | phage protein                                 |               | 1.48  |
| M5005_Spy_1423 | hyaluronoglucosaminidase                      |               | 1.95  |
| M5005_Spy_1424 | phage endopeptidase                           |               | 1.89  |
| M5005_Spy_1425 | phage protein                                 |               | 2.07  |
| M5005_Spy_1426 | phage protein                                 |               | 2.49  |
| M5005_Spy_1427 | phage protein                                 |               | 2.18  |
| M5005_Spy_1428 | phage protein                                 |               | 2.41  |
| M5005_Spy_1429 | phage protein                                 |               | 2.27  |
| M5005_Spy_1430 | phage protein                                 |               | 1.99  |
| M5005_Spy_1431 | phage protein                                 |               | 1.95  |
| M5005_Spy_1432 | phage protein                                 |               | 2.30  |
| M5005_Spy_1433 | phage protein                                 |               | 2.00  |
| M5005_Spy_1434 | phage protein                                 |               | 2.38  |
| M5005_Spy_1435 | phage scaffold protein                        |               | 2.40  |
| M5005_Spy_1436 | phage protein                                 |               | 2.18  |
| M5005_Spy_1437 | hypothetical protein                          |               | 2.26  |
| M5005_Spy_1438 | phage protein                                 |               | 1.81  |
| M5005_Spy_1439 | portal protein                                |               | 2.14  |
| M5005_Spy_1440 | terminase large subunit                       |               | 1.79  |
| M5005_Spy_1441 | phage terminase small subunit                 |               | 1.83  |
| M5005_Spy_1442 | phage transcriptional activator               |               | 2.50  |
| M5005_Spy_1444 | adenine-specific methyltransferase            |               | 1.89  |
| M5005_Spy_1446 | phage protein                                 |               | 1.20  |
| M5005_Spy_1447 | phage-related DNA helicase                    |               | 1.49  |
| M5005_Spy_1448 | hypothetical protein                          |               | 1.22  |
| M5005_Spy_1449 | DNA primase                                   |               | 2.37  |
| M5005_Spy_1450 | phage-encoded DNA polymerase                  |               | 1.80  |
| M5005_Spy_1451 | phage protein                                 |               | 1.69  |
| M5005_Spy_1452 | phage protein                                 |               | 1.74  |
| M5005_Spy_1453 | phage protein                                 |               | 1.60  |
| M5005_Spy_1454 | phage protein                                 |               | 2.02  |
| M5005_Spy_1455 | phage protein                                 |               | 1.82  |
| M5005_Spy_1457 | phage protein                                 |               | 2.66  |
| M5005_Spy_1458 | phage protein                                 |               | 1.70  |
| M5005_Spy_1459 | phage protein                                 |               | 1.57  |
| M5005_Spy_1460 | phage protein                                 |               | 1.35  |
| M5005_Spy_1461 | phage protein                                 |               | 2.43  |
| M5005_Spy_1463 | phage protein                                 |               | 1.79  |
| M5005_Spy_1509 | pyruvate, phosphate dikinase                  |               | -1.36 |
| M5005_Spy_1510 | pyruvate, phosphate dikinase                  |               | -1.26 |
| M5005_Spy_1536 | transposase                                   |               | -1.17 |
| M5005_Spy_1541 | hypothetical protein                          |               | -1.10 |
| M5005_Spy_1574 | universal stress protein family               |               | 2.05  |
| M5005_Spy_1575 | quinolone resistance protein                  | <i>norA</i>   | 2.33  |
| M5005_Spy_1629 | lantibiotic transport ATP-binding protein     | <i>salX</i>   | -1.89 |
| M5005_Spy_1631 | lantibiotic salivaricin A                     | <i>salA</i>   | -1.67 |
| M5005_Spy_1632 | 6-phospho-beta-galactosidase                  | <i>lacG</i>   | -1.66 |
| M5005_Spy_1633 | PTS system, Lactose-specific IIBC component   | <i>lacE</i>   | -2.73 |
| M5005_Spy_1634 | PTS system, Lactose-specific IIA component    | <i>lacF</i>   | -2.22 |
| M5005_Spy_1635 | tagatose-bisphosphate aldolase                | <i>lacD.2</i> | -2.18 |
| M5005_Spy_1636 | tagatose-6-phosphate kinase                   | <i>lacC.2</i> | -1.49 |
| M5005_Spy_1637 | galactose-6-phosphate isomerase lacB subunit  | <i>lacB.2</i> | -1.67 |
| M5005_Spy_1638 | galactose-6-phosphate isomerase lacA subunit  | <i>lacA.2</i> | -1.50 |
| M5005_Spy_1643 | hypothetical protein                          |               | 0.99  |
| M5005_Spy_1663 | PTS system, Mannitol-specific IIB component   |               | -1.69 |
| M5005_Spy_1689 | hypothetical protein                          |               | 1.42  |
| M5005_Spy_1744 | PTS system, Cellobiose-specific IIC component | <i>celC</i>   | -1.34 |

|                |                                               |             |       |
|----------------|-----------------------------------------------|-------------|-------|
| M5005_Spy_1745 | PTS system, Cellobiose-specific IIB component | <i>celB</i> | -0.95 |
| M5005_Spy_1746 | PTS system, Cellobiose-specific IIA component | <i>celA</i> | 1.02  |
| M5005_Spy_1786 | transcriptional regulator, MarR family        |             | 1.04  |
| M5005_Spy_1832 | hypothetical protein                          |             | -1.15 |
| M5005_Spy_1841 | L-serine dehydratase                          | <i>sdhB</i> | -1.06 |
| M5005_Spy_1842 | L-serine dehydratase                          | <i>sdhA</i> | -1.27 |
| M5005_SpyR0011 | large subunit 23S ribosomal RNA               |             | -1.05 |
| M5005_SpyT0020 | tRNA-Pro                                      |             | -1.84 |
| M5005_SpyT0030 | tRNA-Val                                      |             | 1.00  |
| M5005_SpyT0031 | tRNA-Gly                                      |             | -1.80 |
| M5005_SpyT0032 | tRNA-Ile                                      |             | -1.52 |
| M5005_SpyT0033 | tRNA-Glu                                      |             | -1.35 |
| M5005_SpyT0036 | tRNA-Phe                                      |             | -1.13 |
| M5005_SpyT0040 | tRNA-Gln                                      |             | -2.59 |
| M5005_SpyT0041 | tRNA-Leu                                      |             | -1.13 |
| M5005_SpyT0046 | tRNA-Tyr                                      |             | -1.02 |
| M5005_SpyT0052 | tRNA-Thr                                      |             | -1.00 |
| M5005_SpyT0065 | tRNA-Asn                                      |             | -0.97 |

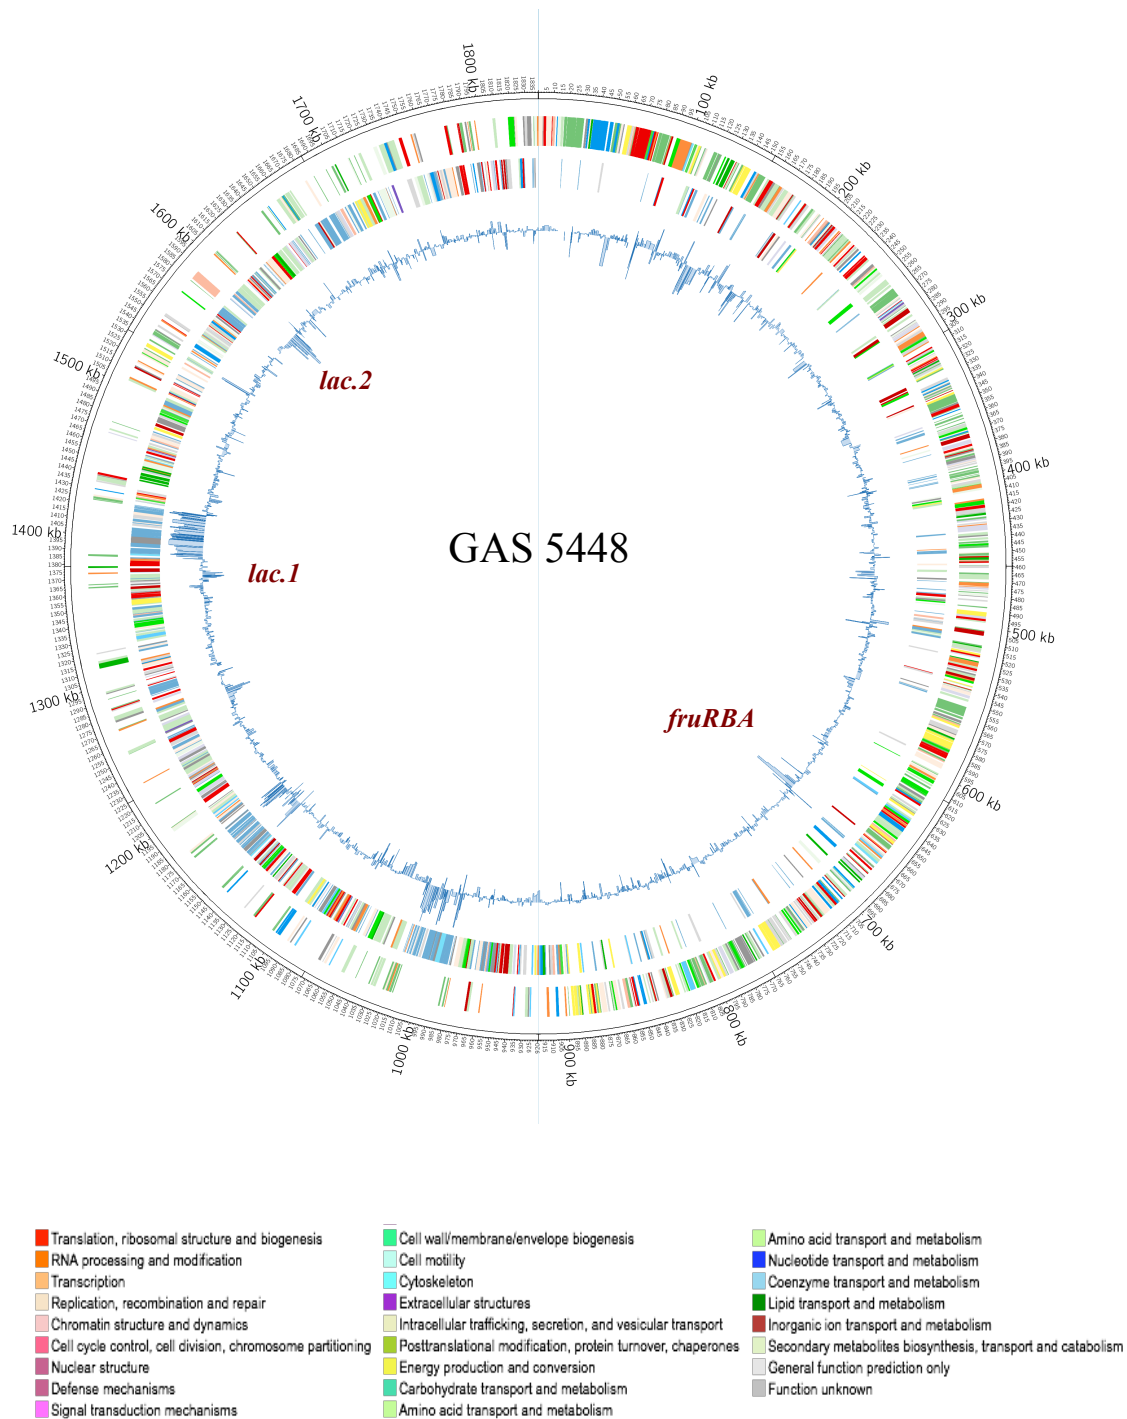

**Figure S1. Transcriptomic landscape of 5448 during growth in fructose.** Circos plot of wild-type GAS 5448 gene global expression altered under growth in CDM + 0.5% glucose versus CDM + 1% fructose. The outer most ring represents a size ruler. The next two rings represent the the GAS open reading frames on the (+) and (-) strand of the genome, respectively. The fourth ring shows transcript levels of genes, where the height of the bars in the fourth ring represent the  $\log_2$  fold change in differential expression in glucose vs. fructose (inside is induced, outside is repressed). The *fruRBA*, and two *lacD* loci induced by fructose are indicated.

**A.**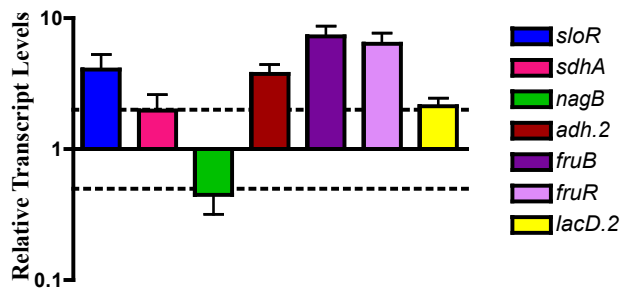**B.**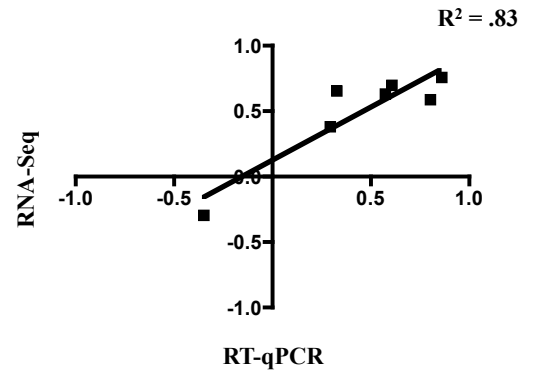

**Figure S2. Validation of RNA-Seq results using qPCR.** (A) Transcript levels were determined using qPCR on RNA taken from GAS grown in fructose compared to glucose as the sole carbon source. Error bars represent the standard error from three biological replicates. Differences greater than 2-fold in expression for fructose grown cells compared to glucose grown cells (denoted by a dashed line) are considered significant. (B) Coefficient of correlation between the RNA-Seq and RT-qPCR results. Generated a confidence in the data with an  $R^2=83\%$ .

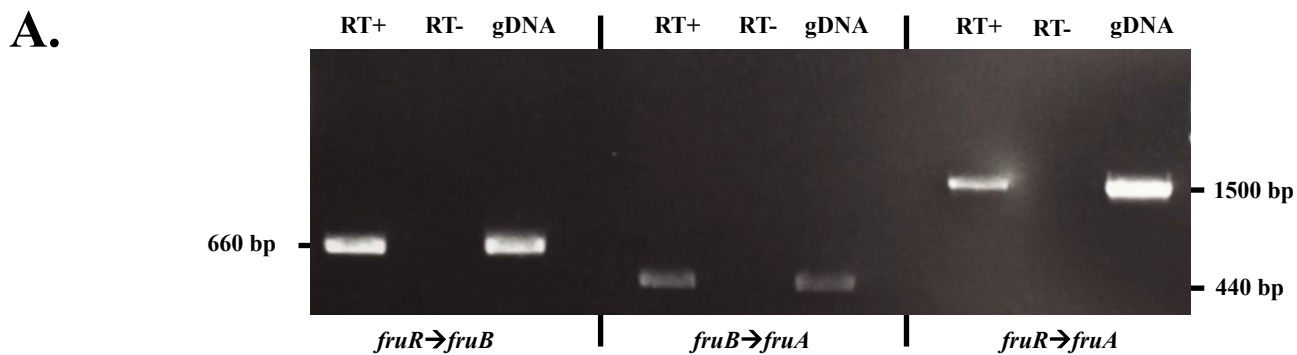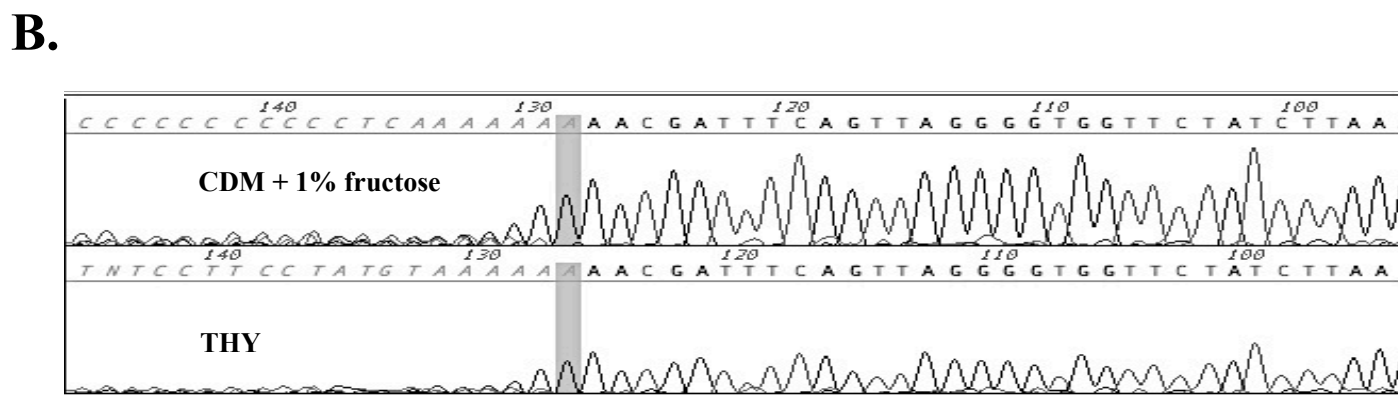

**Fig S3: *fruRBA* is an operon in GAS MIT1 5448.** (A) RT-PCR on RNA isolated from 5448 grown in CDM + 1% fructose demonstrating transcriptional linkage between *fruR/fruB*, *fruB/fruA*, and *fruR/fruA*. Reactions were run using specific primers (Table 2) either with reverse transcriptase (+RT), without reverse transcriptase (-RT) as a negative control, and using genomic DNA (gDNA) as a positive control. Expected sizes of bands are indicated. (B) The transcriptional start site (+1) was determined by 5'-RACE and subsequent DNA sequencing (gray bar) from 5448 grown in THY and CDM + 1% fructose.



**A.**

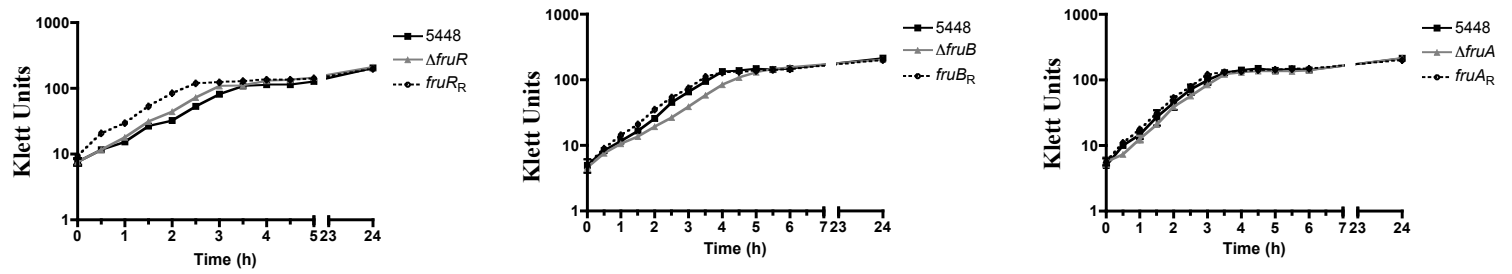

**B.**

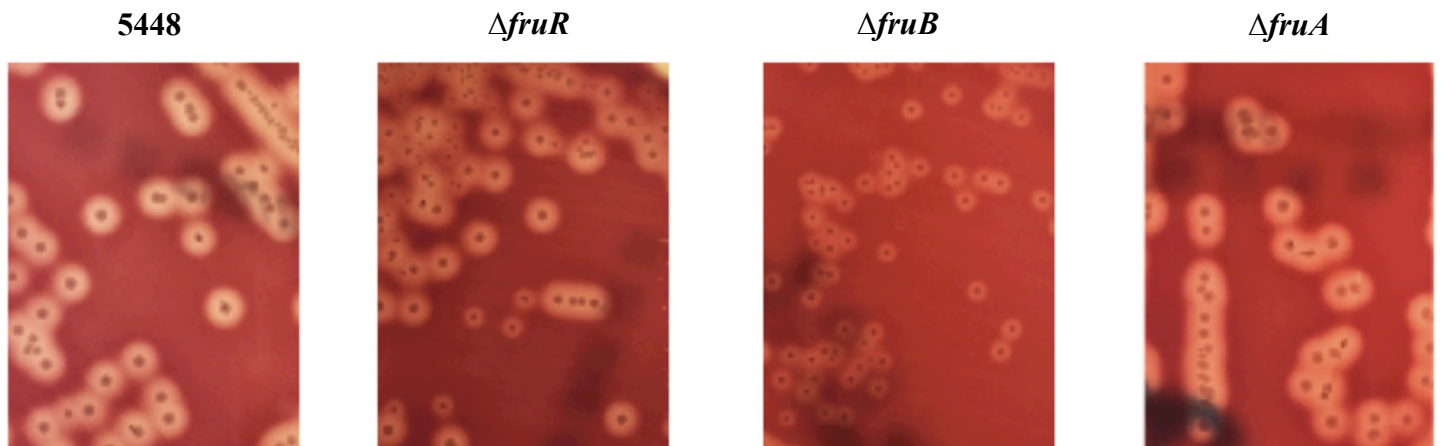

**Figure S4. Growth of individual *fruRBA* operon mutants in rich media. (A)** Each *fru* mutant was grown in THY with their respective revertant strain and the parental 5448. **(B)** Colony morphology of each *fru* mutant was streaked on blood agar (TSA + 5% sheep blood) plates, cultured overnight at 37°C + 5% CO<sub>2</sub> and imaged. Shown are the parental 5448,  $\Delta fruR$ ,  $\Delta fruB$ , and  $\Delta fruA$  as indicated.

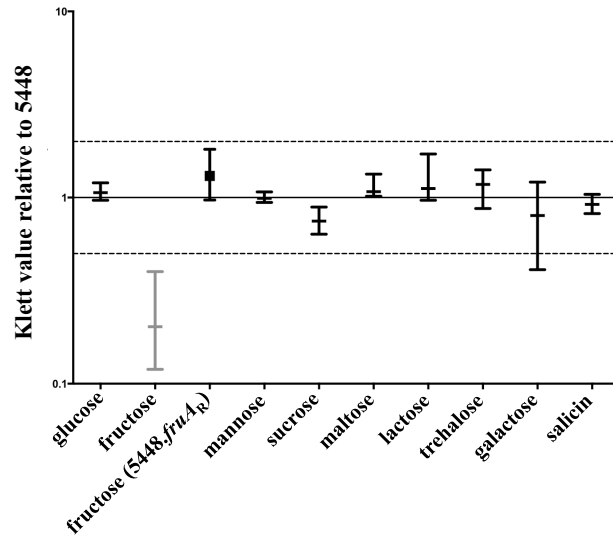

**Figure S5: Growth curve comparison of 5448 to 5448. $\Delta fruA$  across time.** Klett unit relative to 5448 at each time point was calculated by taking the percent WT of each individual time point, and plotting the median percent WT along with the interquartile range (25-75% of the data set). Black bars represent sugars in which 5448. $\Delta fruA$  grows similarly to the parental 5448. Gray bars indicate sugars in which 5448. $\Delta fruA$  grows poorly compared to 5448. Black square represents growth comparison of 5448.fruA<sub>R</sub> to wildtype. Dashed lines represent 2-fold growth above and below 5448.

**A.**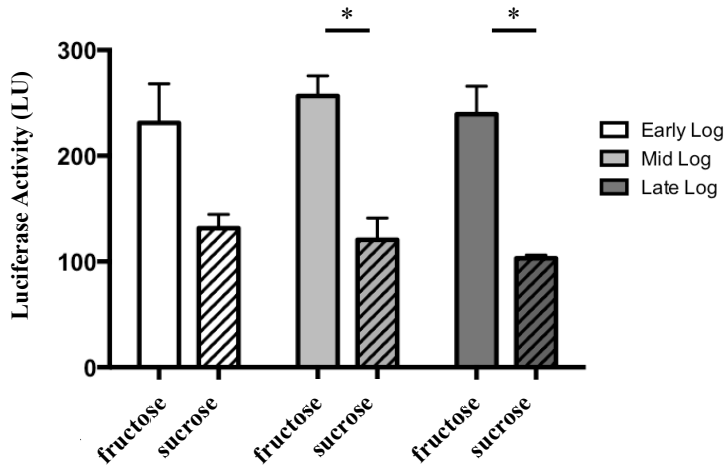**B.**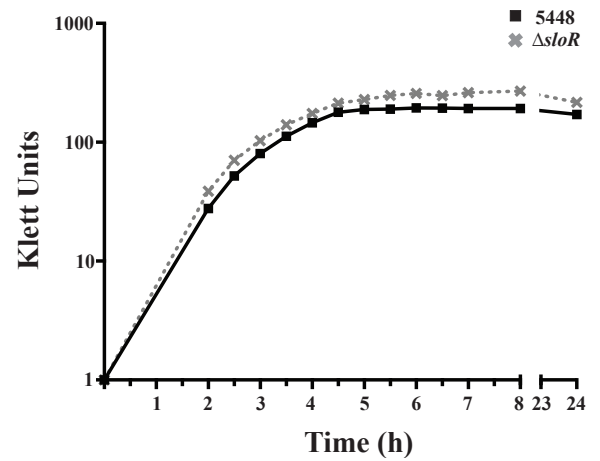

**Figure S6: The effect of fructose on *sloR*.** (A) *PsloR* promoter activity in WT 5448 containing the *PsloR-luc* luciferase reporter plasmid was grown in CDM containing either 1% fructose (solid bars) or sucrose (diagonal bars). Samples were taken at three time points in logarithmic phase of growth (early: white bars; mid: light gray bars; late: dark gray bars) and assayed for luciferase production, expressed in relative luciferase units. Error bars for represent mean  $\pm$  SD of the results from three biological replicates performed in triplicate. Significance for (A) was determined using a Student *t* test ( $p \leq 0.01$ ). (B) Growth of 5448. $\Delta sloR$  in CDM + 1% fructose compared to 5448.

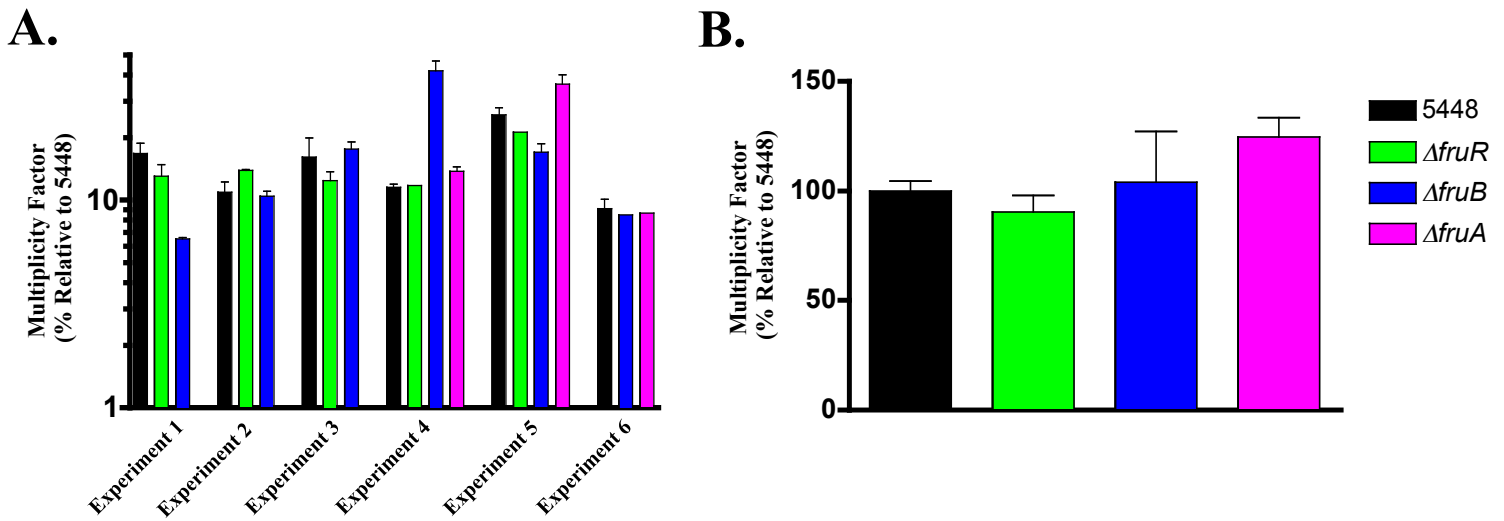

**Figure S7: 5448 and  $\Delta fruRBA$  Growth in RPMI+ 20% Plasma.** Each *fru* mutant was grown along with the parental strain 5448 in RPMI + 20% plasma. Data from 6 independent experiments, with at least three replicates for each *fru* operon mutant in comparison to WT 5448 are shown in (A). The cumulative results of (A) are shown as an average of the replicates in (B).
